# Supplementary material
Source: publisher site journal article supplement (https://www.spandidos-publications.com/2970/downloadSupplementary)
Supplement: Supplementary file 1 [file downloadSupplementary]

## Sheet: Sheet3
The enriched GO terms of common DEGs between CVSMCs and COs
Category	Term	Count	%	P-value	Genes	List Total	Pop Hits	Pop Total	Fold Enrichment	Bonferroni	Benjamini	FDR
GOTERM_MF_DIRECT	GO:0071889~14-3-3 protein binding	2	4.34783	0.060756	IRS2, DDIT4	45	24	16881	31.2611	0.999775	0.999775	51.9955
GOTERM_MF_DIRECT	GO:0050699~WW domain binding	2	4.34783	0.0777864	TCEAL4, TCEAL3	45	31	16881	24.2022	0.999981	0.995597	61.2531
GOTERM_MF_DIRECT	GO:0016491~oxidoreductase activity	3	6.52174	0.0956393	MAOA, ALDH1A3, AOX1	45	200	16881	5.627	0.999999	0.988782	69.1798
GOTERM_CC_DIRECT	GO:0005737~cytoplasm	24	52.1739	0.00122241	SVEP1, MT1M, ADARB1, CRYAB, PODXL, DUSP23, LMCD1, FOXO1, DCN, GAS6, MT1X, DDIT4, LPXN, TSC22D3, CD44, ID2, ADM, ALDH1A3, AOX1, RGCC, HAS2, TUBB3, GCHFR, PPP1R14A	46	5222	18224	1.82079	0.0987462	0.0987462	1.30734
GOTERM_CC_DIRECT	GO:0048471~perinuclear region of cytoplasm	7	15.2174	0.0040182	LPXN, MT1M, APOD, SORBS2, SORT1, PTN, MT1X	46	621	18224	4.46573	0.289819	0.157278	4.2393
GOTERM_CC_DIRECT	GO:0005829~cytosol	16	34.7826	0.0108215	IRS2, CRYAB, DUSP23, FOXO1, ADH1A, ZBTB16, DDIT4, TSC22D3, ID2, ALDH1A3, AOX1, RGCC, SORT1, GCHFR, PPP1R14A, PHLDA1	46	3315	18224	1.91215	0.603406	0.265291	11.0468
GOTERM_CC_DIRECT	GO:0005788~endoplasmic reticulum lumen	4	8.69565	0.0118086	PDGFD, COL8A1, GAS6, PLAUR	46	192	18224	8.25362	0.635674	0.223087	11.9972
GOTERM_CC_DIRECT	GO:0070062~extracellular exosome	14	30.4348	0.015721	FKBP5, CRYAB, PODXL, DUSP23, GAS6, PLAUR, CD44, APOD, ALDH1A3, FBLN5, AOX1, PDGFD, COL8A1, TUBB3	46	2811	18224	1.97312	0.739956	0.236148	15.6742
GOTERM_CC_DIRECT	GO:0005615~extracellular space	9	19.5652	0.0161587	ADM, APOD, PODXL, FBLN5, LMCD1, PTN, PDGFD, DCN, GAS6	46	1347	18224	2.64704	0.749604	0.20609	16.0767
GOTERM_CC_DIRECT	GO:0031012~extracellular matrix	4	8.69565	0.0364689	FBLN5, LMCD1, DCN, COL8A1	46	296	18224	5.3537	0.95748	0.363081	32.9473
GOTERM_CC_DIRECT	GO:0030425~dendrite	4	8.69565	0.0495612	APOD, SORT1, TUBB3, GCHFR	46	335	18224	4.73043	0.986709	0.417301	42.1249
GOTERM_CC_DIRECT	GO:0005925~focal adhesion	4	8.69565	0.0718266	LPXN, CD44, SORBS2, PLAUR	46	391	18224	4.05293	0.998228	0.505376	55.1533
GOTERM_CC_DIRECT	GO:0005634~nucleus	19	41.3043	0.091051	MT1M, ADARB1, CRYAB, DUSP23, LMCD1, FOXO1, ZBTB16, MT1X, TCEAL4, TCEAL3, LPXN, TSC22D3, ID2, SORBS2, RGCC, ADRA1B, FOXD1, TUBB3, GCHFR	46	5415	18224	1.39008	0.999701	0.555793	64.1955
GOTERM_CC_DIRECT	GO:0005576~extracellular region	8	17.3913	0.0981108	SVEP1, ADM, APOD, FBLN5, PDGFD, DCN, COL8A1, GAS6	46	1610	18224	1.96857	0.999846	0.549747	67.0766
GOTERM_BP_DIRECT	GO:0036120~cellular response to platelet-derived growth factor stimulus	3	6.52174	0.000999655	PTN, HAS2, PDGFD	45	18	16792	62.1926	0.419627	0.419627	1.44677
GOTERM_BP_DIRECT	GO:0007155~cell adhesion	7	15.2174	0.00118118	LPXN, SVEP1, CD44, SORBS2, PODXL, COL8A1, GAS6	45	459	16792	5.69083	0.474255	0.274917	1.70738
GOTERM_BP_DIRECT	GO:0043065~positive regulation of apoptotic process	5	10.8696	0.0077312	ADM, ALDH1A3, FOXO1, PTN, ZBTB16	45	300	16792	6.21926	0.985332	0.755214	10.693
GOTERM_BP_DIRECT	GO:1900625~positive regulation of monocyte aggregation	2	4.34783	0.00784077	CD44, HAS2	45	3	16792	248.77	0.986188	0.657179	10.8366
GOTERM_BP_DIRECT	GO:0007568~aging	4	8.69565	0.00918638	ADM, APOD, CRYAB, DCN	45	165	16792	9.0462	0.993399	0.633625	12.5825
GOTERM_BP_DIRECT	GO:0016525~negative regulation of angiogenesis	3	6.52174	0.0114857	RGCC, PTN, DCN	45	62	16792	18.0559	0.998135	0.649149	15.4923
GOTERM_BP_DIRECT	GO:0030335~positive regulation of cell migration	4	8.69565	0.0123325	IRS2, PODXL, HAS2, PDGFD	45	184	16792	8.11208	0.99883	0.618778	16.5411
GOTERM_BP_DIRECT	GO:0042133~neurotransmitter metabolic process	2	4.34783	0.0130345	MAOA, GCHFR	45	5	16792	149.262	0.999205	0.590237	17.4013
GOTERM_BP_DIRECT	GO:0043154~negative regulation of cysteine-type endopeptidase activity involved in apoptotic process	3	6.52174	0.0140855	CD44, CRYAB, GAS6	45	69	16792	16.2242	0.999555	0.575754	18.6737
GOTERM_BP_DIRECT	GO:0030198~extracellular matrix organization	4	8.69565	0.0146015	CD44, FBLN5, DCN, COL8A1	45	196	16792	7.61542	0.999665	0.55075	19.2916
GOTERM_BP_DIRECT	GO:0085029~extracellular matrix assembly	2	4.34783	0.0182017	HAS2, GAS6	45	7	16792	106.616	0.999954	0.596852	23.4834
GOTERM_BP_DIRECT	GO:0043066~negative regulation of apoptotic process	5	10.8696	0.0307787	CD44, CRYAB, FOXO1, GAS6, PLAUR	45	455	16792	4.10061	1	0.757615	36.5886
GOTERM_BP_DIRECT	GO:0010628~positive regulation of gene expression	4	8.69565	0.0310928	ID2, RGCC, FOXD1, GAS6	45	262	16792	5.69703	1	0.733338	36.8874
GOTERM_BP_DIRECT	GO:0008284~positive regulation of cell proliferation	5	10.8696	0.0331851	IRS2, ADM, PTN, HAS2, PDGFD	45	466	16792	4.00381	1	0.730547	38.8445
GOTERM_BP_DIRECT	GO:0050900~leukocyte migration	3	6.52174	0.0406207	CD44, PODXL, GAS6	45	122	16792	9.17596	1	0.777745	45.3513
GOTERM_BP_DIRECT	GO:0045892~negative regulation of transcription, DNA-templated	5	10.8696	0.0410567	ID2, FOXO1, ZBTB16, FOXD1, GAS6	45	499	16792	3.73903	1	0.759586	45.7121
GOTERM_BP_DIRECT	GO:0048011~neurotrophin TRK receptor signaling pathway	2	4.34783	0.0411288	SORT1, DDIT4	45	16	16792	46.6444	1	0.739187	45.7716
GOTERM_BP_DIRECT	GO:0044849~estrous cycle	2	4.34783	0.0436437	PTN, HAS2	45	17	16792	43.9007	1	0.740412	47.8076
GOTERM_BP_DIRECT	GO:0045926~negative regulation of growth	2	4.34783	0.0486543	MT1M, MT1X	45	19	16792	39.2795	1	0.760231	51.6534
GOTERM_BP_DIRECT	GO:0071294~cellular response to zinc ion	2	4.34783	0.0486543	MT1M, MT1X	45	19	16792	39.2795	1	0.760231	51.6534
GOTERM_BP_DIRECT	GO:0071158~positive regulation of cell cycle arrest	2	4.34783	0.0635324	ID2, RGCC	45	25	16792	29.8524	1	0.832273	61.5747
GOTERM_BP_DIRECT	GO:0048589~developmental growth	2	4.34783	0.0635324	ADM, GAS1	45	25	16792	29.8524	1	0.832273	61.5747
GOTERM_BP_DIRECT	GO:0019216~regulation of lipid metabolic process	2	4.34783	0.0659899	IRS2, ID2	45	26	16792	28.7043	1	0.829406	63.0181
GOTERM_BP_DIRECT	GO:0008283~cell proliferation	4	8.69565	0.07064	IRS2, ADRA1B, GAS6, DDIT4	45	366	16792	4.0782	1	0.836591	65.6121
GOTERM_BP_DIRECT	GO:0071549~cellular response to dexamethasone stimulus	2	4.34783	0.0733246	FOXO1, DDIT4	45	29	16792	25.7349	1	0.834892	67.0315
GOTERM_BP_DIRECT	GO:0001666~response to hypoxia	3	6.52174	0.074608	ADM, CRYAB, DDIT4	45	172	16792	6.50853	1	0.827529	67.6906
GOTERM_BP_DIRECT	GO:0016477~cell migration	3	6.52174	0.074608	SORBS2, PODXL, GAS6	45	172	16792	6.50853	1	0.827529	67.6906
GOTERM_BP_DIRECT	GO:0070374~positive regulation of ERK1 and ERK2 cascade	3	6.52174	0.0768666	CD44, PDGFD, GAS6	45	175	16792	6.39695	1	0.82455	68.8208
GOTERM_BP_DIRECT	GO:0007596~blood coagulation	3	6.52174	0.0837716	HPS5, PDGFD, PLAUR	45	184	16792	6.08406	1	0.839675	72.0519
GOTERM_BP_DIRECT	GO:0008285~negative regulation of cell proliferation	4	8.69565	0.0848954	ADARB1, ADM, RGCC, ZBTB16	45	396	16792	3.76925	1	0.832619	72.5473
GOTERM_BP_DIRECT	GO:0072593~reactive oxygen species metabolic process	2	4.34783	0.0878255	AOX1, DDIT4	45	35	16792	21.3232	1	0.832362	73.8006
GOTERM_BP_DIRECT	GO:0007420~brain development	3	6.52174	0.0884777	IRS2, APOD, DDIT4	45	190	16792	5.89193	1	0.82409	74.0722
GOTERM_BP_DIRECT	GO:0007162~negative regulation of cell adhesion	2	4.34783	0.0926096	LPXN, PODXL	45	37	16792	20.1706	1	0.828341	75.7331
GOTERM_BP_DIRECT	GO:0010811~positive regulation of cell-substrate adhesion	2	4.34783	0.0949925	PTN, COL8A1	45	38	16792	19.6398	1	0.826494	76.6453
GOTERM_BP_DIRECT	GO:0010508~positive regulation of autophagy	2	4.34783	0.0997399	FOXO1, DCN	45	40	16792	18.6578	1	0.832407	78.3683
